# Supplementary material
Source: PubMed Central journal article supplement (PMC3434785)
Supplement: supp_M111.016410_mcp.M111.016410-1.pdf [file supp_M111.016410_mcp.M111.016410-1.pdf]

# Supplement: Phospho-signature predicts dasatinib response in non-small cell lung cancer

Martin Klammer      Marc Kaminski      Alexandra Zedler  
Felix Oppermann      Stefan Müller      Andreas Tebbe      Klaus Godl  
Christoph Schaab

## 1 Cost matrix example

The example in Fig. S1A shows how the introduction of cost matrices influences the support vector classification. The figure shows a classification example that aims at separating red stars from blue crosses. Each class contains 10 samples with two features. The values of both features were sampled from normal distributions ( $N(1,1)$  and  $N(-1,1)$  for crosses and stars, respectively). The black line represents the separating hyperplane of the SVM classification with linear kernel (parameter  $C=1$ ), when no explicit cost matrix is applied (i.e. the cost of misclassifying a star is the same as the cost for misclassifying a cross). One can clearly see that the data is not linearly separable, which leads to one misclassified cross and one misclassified star. The red line shows the hyperplane when the cost for the false classification of stars is twice as high as the cost for star misclassification. As a result, the separating hyperplane is shifted towards the cloud of red stars, but the classification result is still the same. By increasing the cost factor of cross misclassification to ten times the cost of star misclassification, the hyperplane (blue line) is shifted further and all crosses are classified correctly. However, instead of one falsely predicted star there are now four. Finally, when using a cost factor of 200 (see purple line), all samples would be classified as crosses leading to ten wrongly predicted stars.

This shifting of the hyperplane can be used to calculate the receiver operating characteristic (ROC) curve and the area under it. A ROC curve based on the four different cost matrices above would look like Fig. S1B (assuming that the crosses are the positives and the stars the negatives in the ROC statistics). The point at (1.0|1.0) corresponds to the purple hyperplane, where all crosses are classified correctly and all stars wrongly; the point at (0.4|1.0) to the blue discrimination line, where all crosses are classified correctly and 4 stars are falsely predicted as positives; the point at (0.1|0.9) to both the red and black hyperplane, where 9 crosses are classified correctly and one star wrongly as positive; and finally one more point at (0|0) that is not depicted in Fig S1A but represents the extreme when all samples are assumed to be negatives (stars), which can be considered the opposite of the purple discrimination line. Finally, the area under the curve can be computed, which is 0.93 in this example.

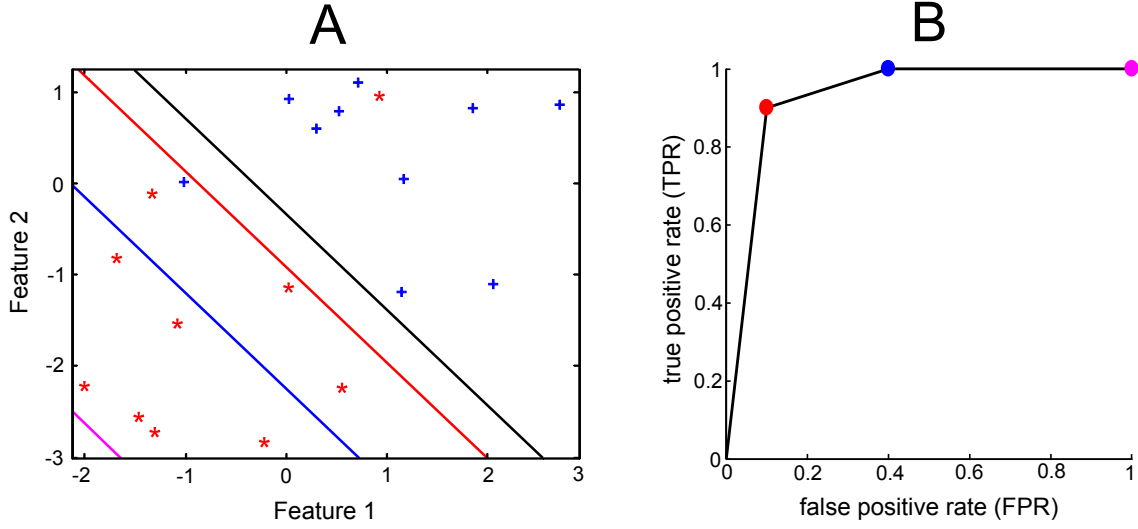

Fig. S 1: Classification example using a linear SVM with different cost matrices (A), and the corresponding ROC curve (B).

## 2 Details on SVM prediction

The decision function of the SVM classification is given by

$$f(\vec{x}) = \text{sgn} \left( \sum_{i=1}^m y_i \alpha_i k(\vec{x}_i, \vec{x}) + b \right), \quad (1)$$

where  $m$  is the number of training samples (cell lines),  $y_i$  the class label of the  $i^{\text{th}}$  training sample (-1 or 1 for sensitive and resistant cell lines, respectively),  $\alpha_i$  the respective Lagrange multiplier,  $\vec{x}_i$  a vector of length  $f$  ( $f$  being the number of selected features) holding the ratios of the  $i^{\text{th}}$  training sample,  $\vec{x}$  a vector of length  $f$  holding the ratios of the test sample, and  $b$  the bias (i.e. the translation of the hyperplane with respect to the origin).  $k(\vec{x}_i, \vec{x})$  is called a kernel, i.e. a function that characterizes the similarity of two vectors. Equation [1] can be rewritten as

$$f(\vec{x}) = \text{sgn} \left( k(\vec{w}, \vec{x}) + b \right), \quad (2)$$

with the weight vector  $\vec{w}$ , whose elements represent the importance (influence) of the corresponding features, defined as  $\vec{w} = \sum_{i=1}^m \alpha_i y_i \vec{x}_i$ . In the case of the linear SVM, the kernel function is defined as the dot product of the two vectors, which leads to the linear decision function

$$f(\vec{x}) = \text{sgn} \left( \sum_{j=1}^f w_j x_j + b \right). \quad (3)$$

So far, changes in the phosphorylation level were represented by ratios, which can be expressed as  $x = S - S_{ref}$ , where  $S$  is the signal of the phosphosite in the corresponding cell line and  $S_{ref}$  the signal of the site in the reference cell line pool. Here, the signal is defined as log intensity of the corresponding phosphosite. For data produced by other methods such as multiple reaction monitoring or ELISA, where the quantitative data are represented by intensities, one can still

make predictions with the proposed phospho-signature, but the decision function (Equation [2]) has to be modified to

$$f(\vec{S}) = \text{sgn}\left(k(\vec{w}, \vec{S}) + \underbrace{b - k(\vec{w}, \vec{S}_{ref})}_{\tilde{b}}\right). \quad (4)$$

Note, that only the bias term has to be modified while the weight vector  $\vec{w}$  stays the same. In geometrical terms, the orientation of the hyperplane does not change, but is translated to the new position. In the case of the linear SVM the decision function thus changes to

$$f(\vec{S}) = \text{sgn}\left(\sum_{j=1}^f w_j S_j + \tilde{b}\right). \quad (5)$$

### 3 Supplemental figures mentioned in the main article

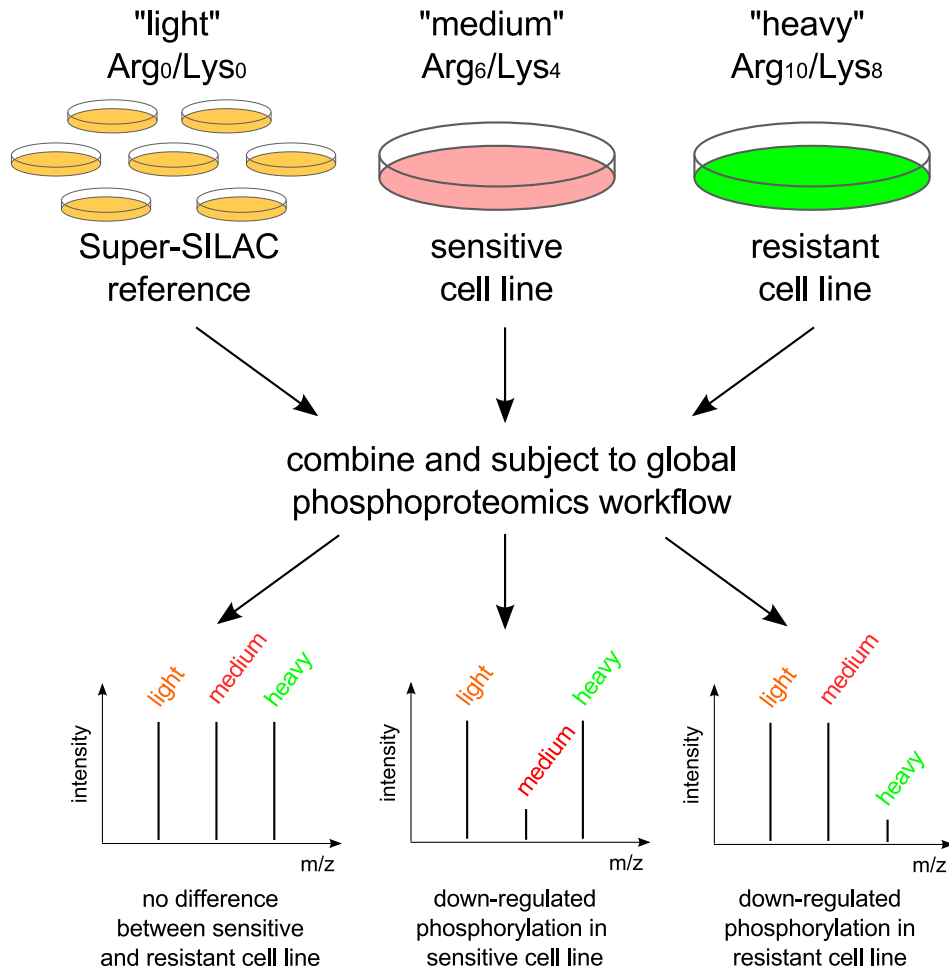

Fig. S 2: SILAC labelling diagram. The scheme illustrates how isotopic labelling enables relative quantification of phosphorylation amounts via a spike-in reference (SuperSILAC).

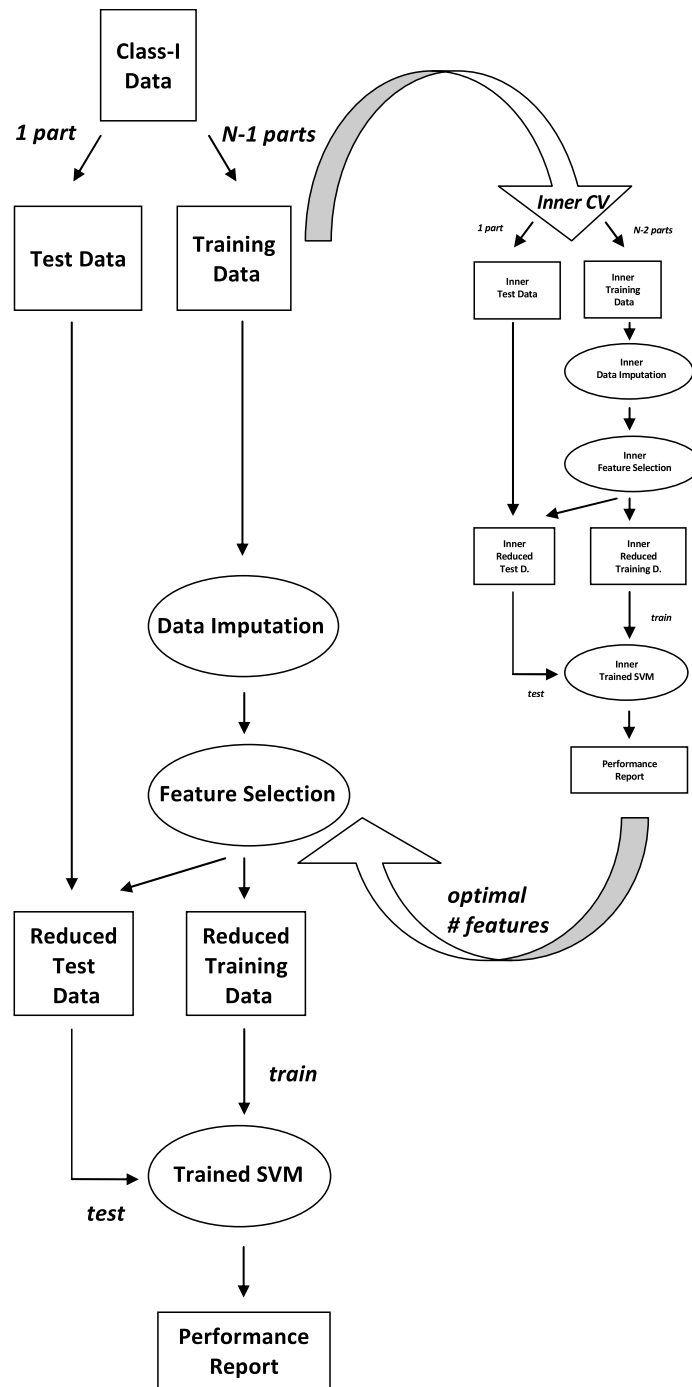

Fig. S 3: Workflow diagram for prediction quality assessment. Two cross validation loops are applied to estimate the prediction accuracy: in the inner CV loop the optimal number of features is determined. This number is then used in the feature selection process in the outer CV loop. Subsequently, an SVM is trained and tested with the respective data sets. The prediction results in each outer CV loop are combined and the prediction accuracy is calculated.

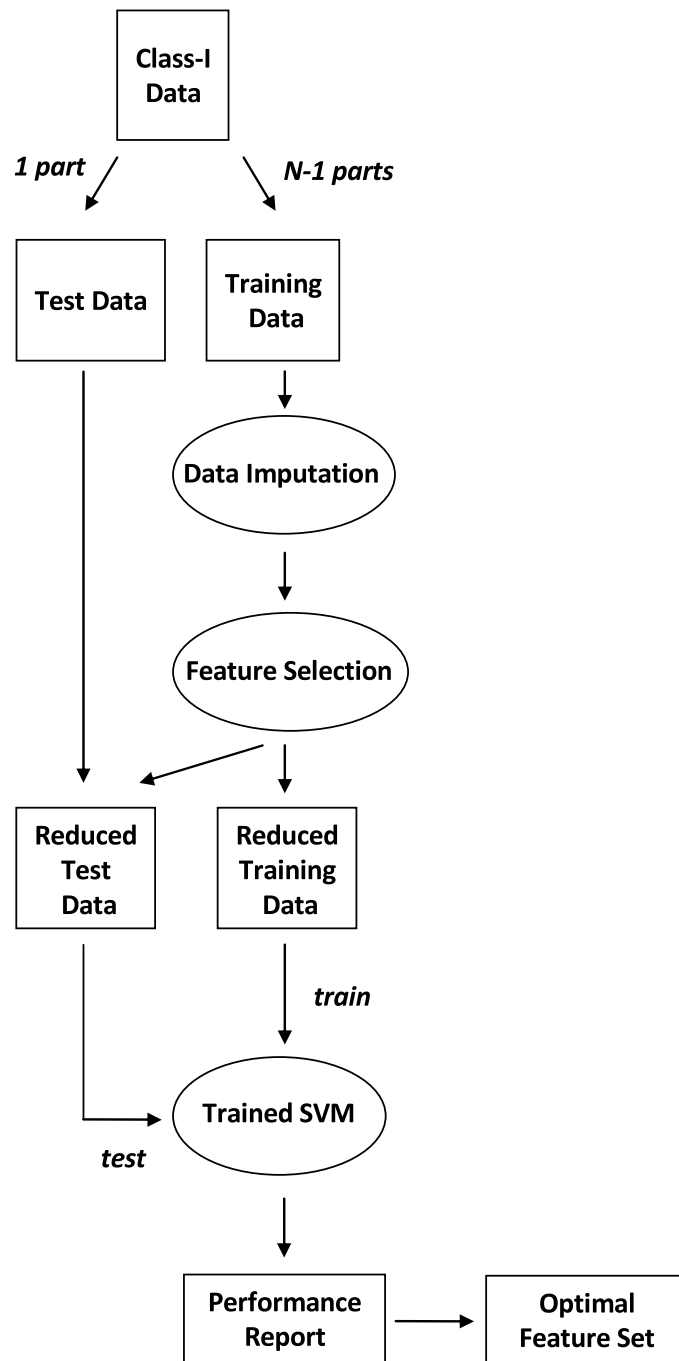

Fig. S 4: Workflow diagram for finding the final phospho-signature. The workflow corresponds to one inner CV loop in Fig. S2 resulting in the optimal set of features, which is then used to train the final SVM predictor.

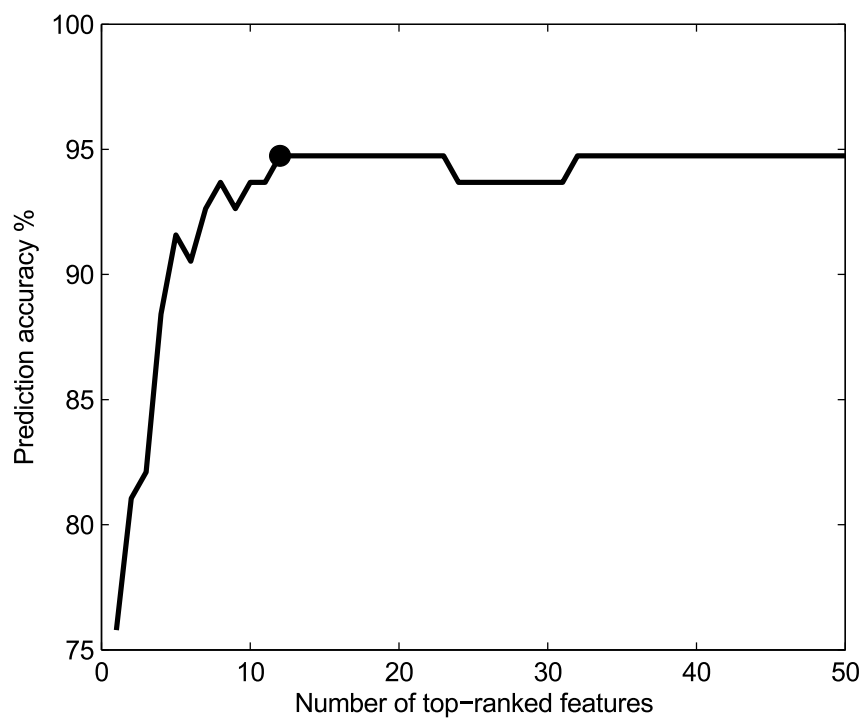

Fig. S 5: The prediction accuracy depending on the number of top-ranked features incorporated into the phospho-signature. While the accuracy increased with the first few features, it reached its maximum at 12 features (circle), where it saturated.

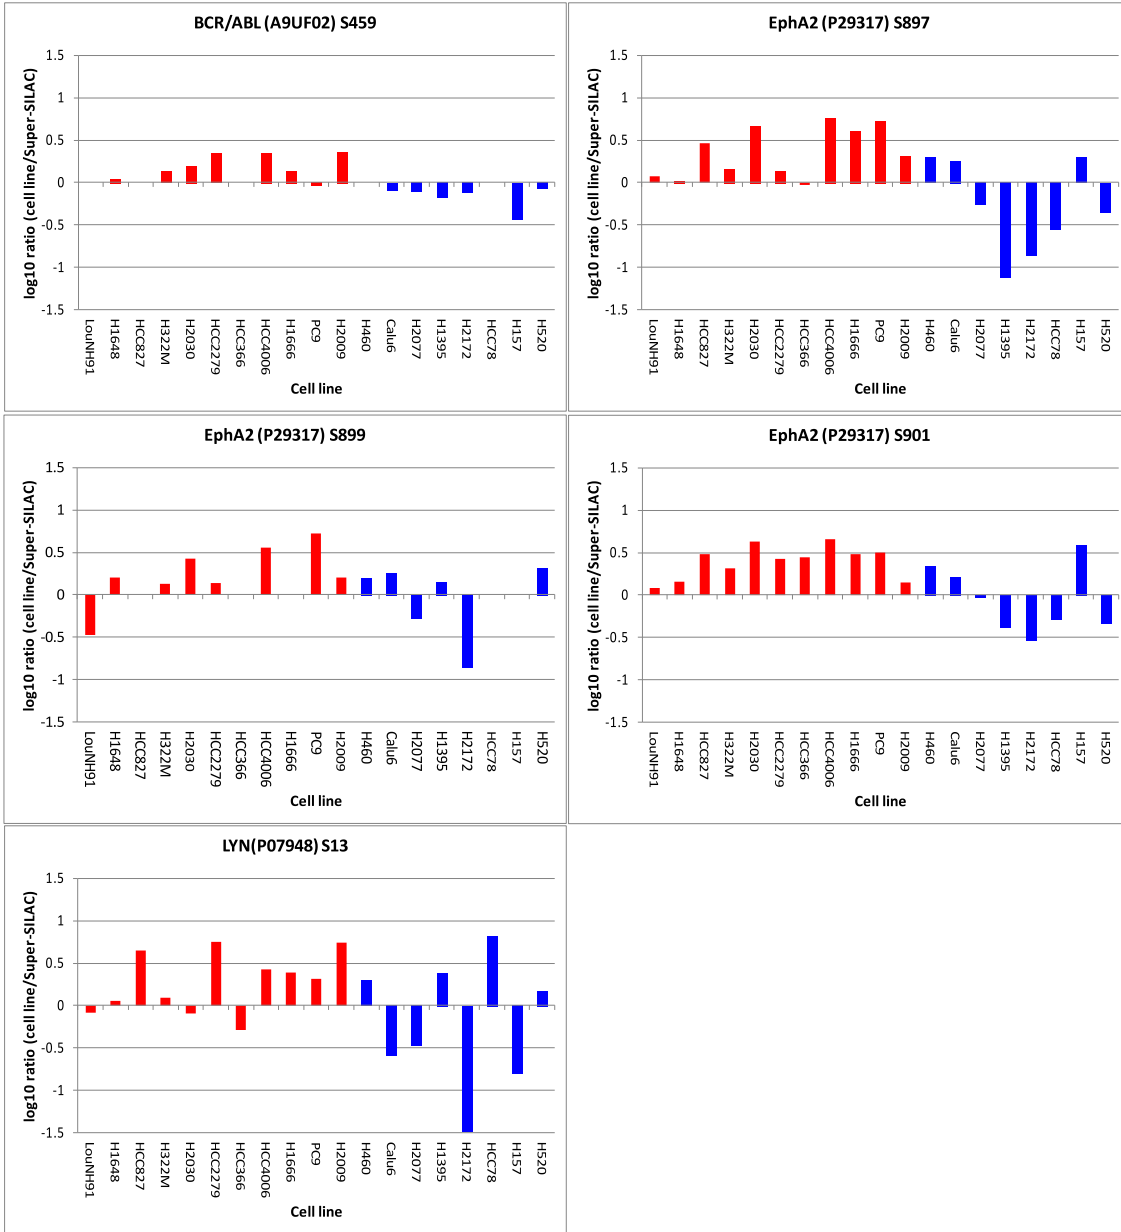

Fig. S 6: Bar charts of log<sub>10</sub> ratios (cell line/Super-SILAC) of phosphorylation sites on tyrosine kinases quantified in at least two thirds of the experiments.



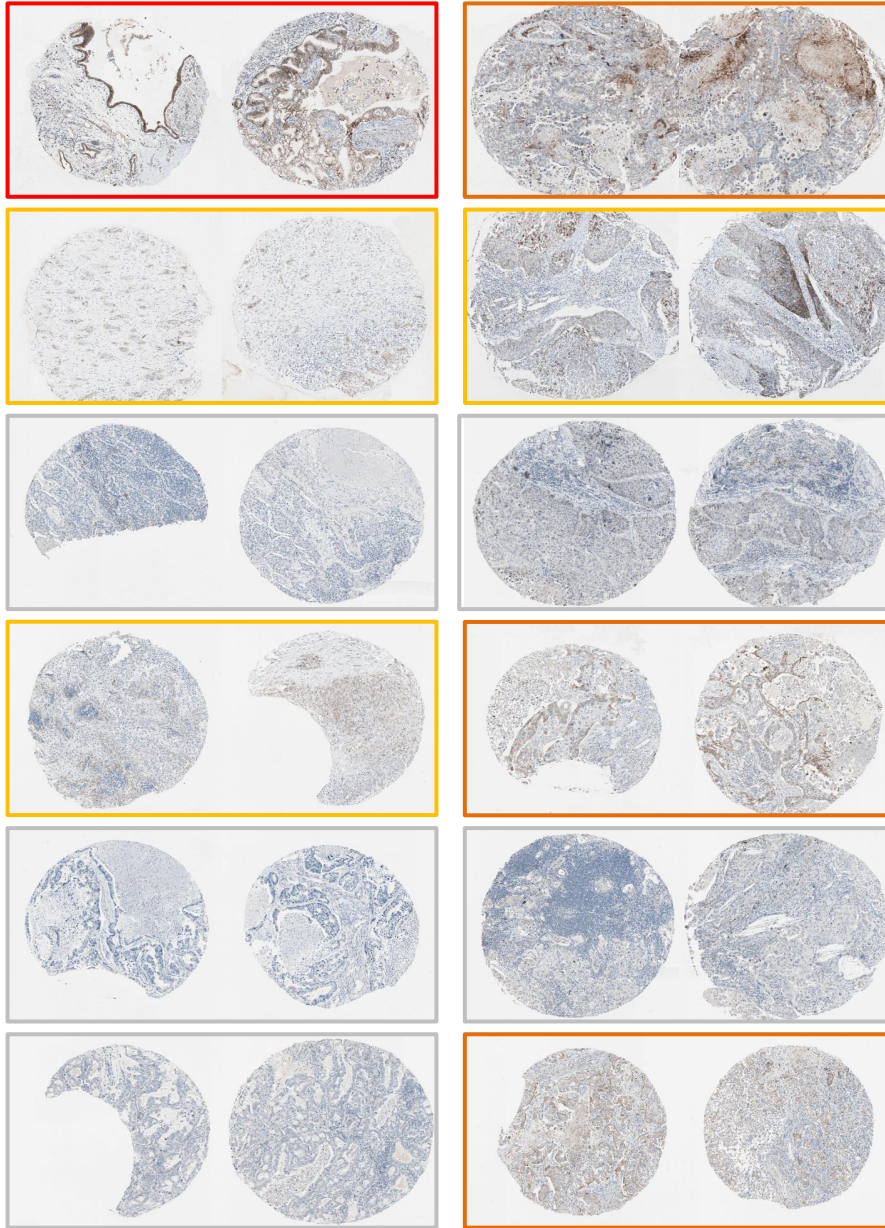

Fig. S7A: Immunohistochemical staining of lung cancer tissues from the Human Protein Atlas. A red border indicates heavy staining, orange moderate, yellow weak and grey no staining.

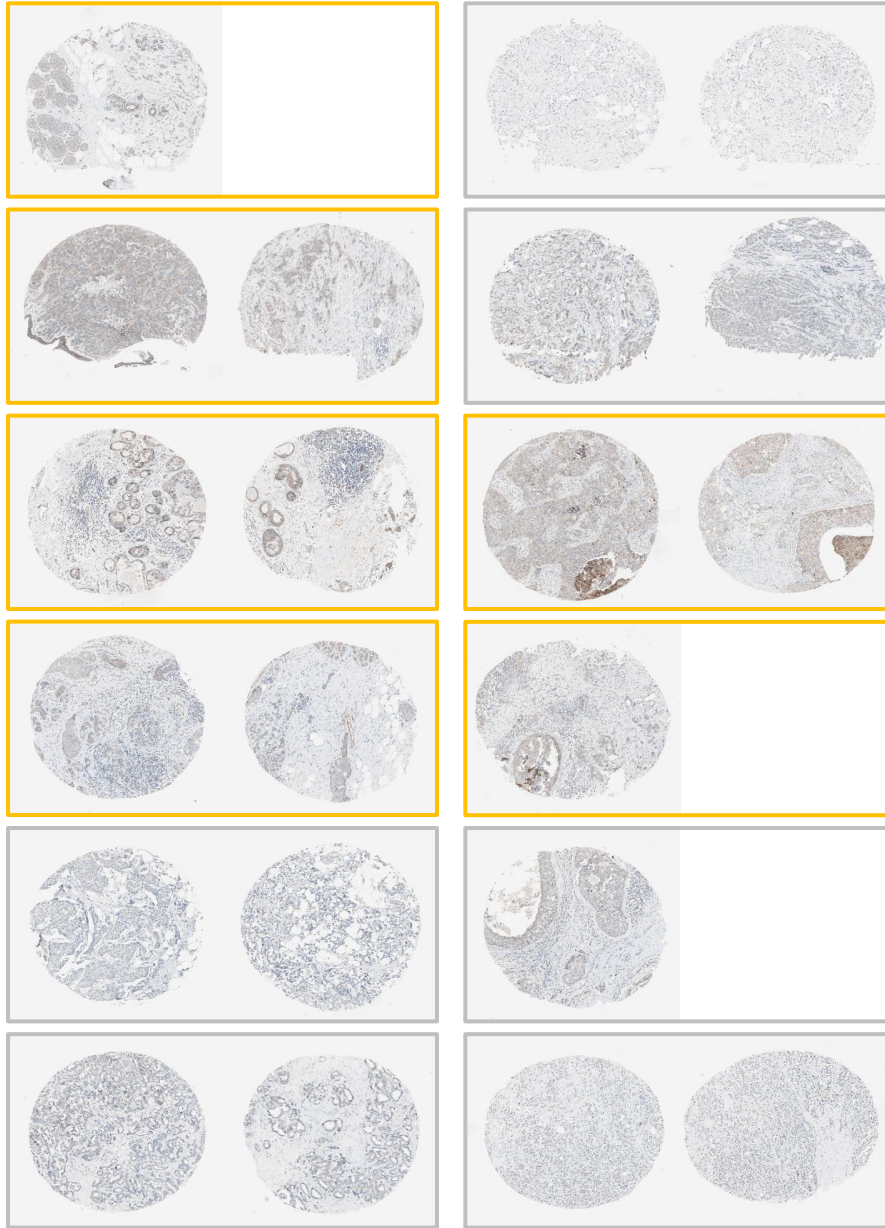

Fig. S7B: Immunohistochemical staining of breast cancer tissues from the Human Protein Atlas. A yellow border indicates weak staining and grey no staining.

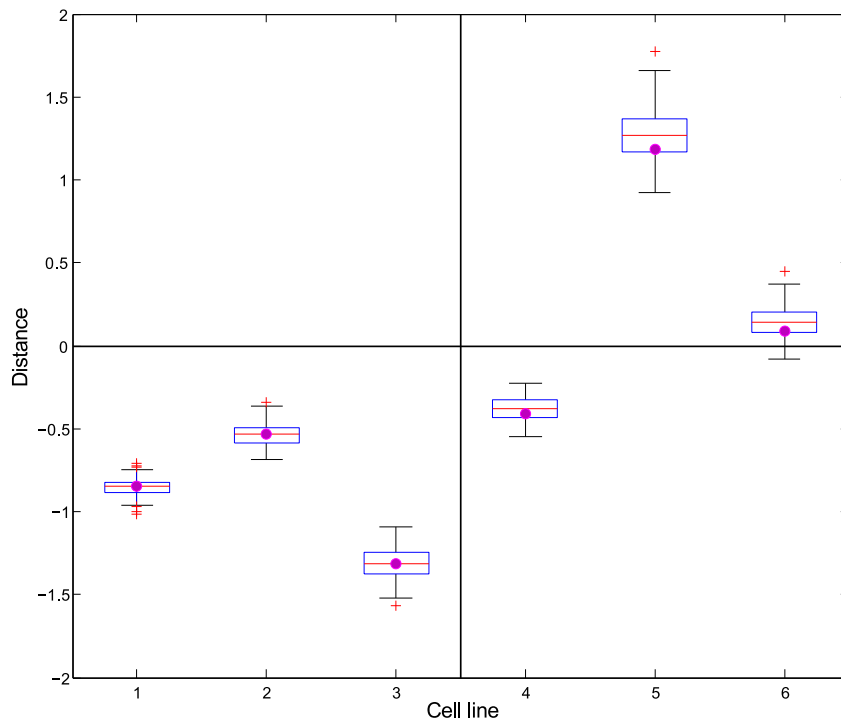

Fig. S 8: Effect of the imputation method for the final predictor when applied to the breast cancer samples. Purple dots indicate the classification result with the predictor trained on the mean-imputed NSCLC data, the box plots show the results for the iputation based on 100 samplings from the respective normal distribution of each feature and class.

## 4 Supplemental tables mentioned in the main article

**Table S 1. Cell line information**

| Cell line  | Indication | Origin           | Supplier number | GI <sub>50</sub> ( $\mu$ M) dasatinib literature* | GI <sub>50</sub> ( $\mu$ M) dasatinib this paper | Class | Valid <sup>†</sup> | TP53 mutation <sup>‡</sup> | TP53 status | Doubling time (h) | GI <sub>50</sub> ( $\mu$ M) sorafenib * literature |
|------------|------------|------------------|-----------------|---------------------------------------------------|--------------------------------------------------|-------|--------------------|----------------------------|-------------|-------------------|----------------------------------------------------|
| Calu6      | NSCLC      | ATCC             | HTB-56          | 22.54                                             | 2.8                                              | -     | YES                | c.586C>T; Arg->STOP        | MUT         | 25                | 30                                                 |
| H1395      | NSCLC      | ATCC             | CRL-5868        | 31.12                                             | 4.7                                              | -     | YES                | WT                         | WT          | 50                | 7.24                                               |
| H1568      | NSCLC      | ATCC             | CRL-5876        | 0.8975                                            | 5.44                                             | +     | no                 | -                          | -           | 59                | 6.46                                               |
| H157       | NSCLC      | MPI <sup>§</sup> | -               | 10.54                                             | 2.63                                             | -     | YES                | c.892G>T; Glu->STOP        | MUT         | 25                | 6.61                                               |
| H1648      | NSCLC      | ATCC             | CRL-5882        | 0.0593                                            | 0.079                                            | +     | YES                | c.102_103ins1; Leu->?      | MUT         | 50                | 6.03                                               |
| H1666      | NSCLC      | ATCC             | CRL-5885        | 0.175                                             | 0.076                                            | +     | YES                | WT                         | WT          | 30                | 30                                                 |
| H2009      | NSCLC      | ATCC             | CRL-5911        | 0.7465                                            | 0.085                                            | +     | YES                | c.818G>T; Arg->Leu         | MUT         | 50                | 11.09                                              |
| H2030      | NSCLC      | ATCC             | CRL-5914        | 0.1183                                            | 0.022                                            | +     | YES                | c.785G>T; Gly->Val         | MUT         | 25                | 7.76                                               |
| H2077      | NSCLC      | MPI              | -               | 10.07                                             | 4.75                                             | -     | YES                | -                          | -           | 50                | 5.37                                               |
| H2172      | NSCLC      | ATCC             | CRL-5930        | 16.71                                             | 5.85                                             | -     | YES                | -                          | -           | 50                | -                                                  |
| H2887      | NSCLC      | MPI              | -               | 11.3                                              | 0.176                                            | -     | no                 | -                          | -           | 40                | 13.65                                              |
| H322       | NSCLC      | MPI              | -               | 0.2588                                            | 2.1                                              | +     | no                 | c.743G>T; Arg->Leu         | MUT         | -                 | 5.43                                               |
| H460       | NSCLC      | ATCC             | HTB-177         | 24.16                                             | 3.9                                              | -     | YES                | WT                         | WT          | 25                | 30                                                 |
| HCC827     | NSCLC      | ATCC             | CRL-2868        | 0.1456                                            | 0.033                                            | +     | YES                | -                          | -           | 43                | 5.25                                               |
| H520       | NSCLC      | ATCC             | HTB-182         | 11.56                                             | 1.43                                             | -     | YES                | c.438G>A; Trp->STOP        | MUT         | 42                | 4.84                                               |
| H647       | NSCLC      | ATCC             | CRL-5834        | 12.39                                             | 0.016                                            | -     | no                 | c.782+1G>T; [intron!]      | MUT         | -                 | 12.45                                              |
| HCC1359    | NSCLC      | MPI              | -               | 11.3                                              | 0.52                                             | -     | no                 | c.388C>T; Leu->Phe         | MUT         | 30                | 11.89                                              |
| LCLC103H   | NSCLC      | DSMZ             | ACC 384         | 13.9                                              | 0.08                                             | -     | no                 | c.646G>T; Val->Leu         | MUT         | -                 | 9.66                                               |
| LouNH91    | NSCLC      | DSMZ             | ACC 393         | 0.113                                             | 0.068                                            | +     | YES                | -                          | -           | 55                | 4.68                                               |
| HCC366     | NSCLC      | DSMZ             | ACC 492         | 0.482                                             | 0.017                                            | +     | YES                | -                          | -           | 53                | 6.03                                               |
| HCC4006    | NSCLC      | ATCC             | CRL-2871        | 0.8376                                            | 0.95                                             | +     | YES                | -                          | -           | -                 | 6.46                                               |
| HCC78      | NSCLC      | DSMZ             | ACC 563         | 13.9                                              | 17.05                                            | -     | YES                | -                          | -           | -                 | 11.09                                              |
| H322M      | NSCLC      | MPI              | -               | 0.0819                                            | 0.311                                            | +     | YES                | c.743G>T; Arg->Leu         | MUT         | -                 | 14.13                                              |
| HOP62      | NSCLC      | MPI              | -               | 12.76                                             | 0.014                                            | -     | no                 | c.633_634ins36; Phe->?     | MUT         | -                 | 9.44                                               |
| HCC2279    | NSCLC      | MPI              | -               | 0.139                                             | 0.045                                            | +     | YES                | c.701A>G; Tyr->Cys         | MUT         | -                 | 12.45                                              |
| PC9        | NSCLC      | MPI              | -               | 0.4603                                            | 0.02                                             | +     | YES                | c.743G>A; Arg->Gln         | MUT         | 25                | 15.85                                              |
| BT-20      | Breast c.  | ATCC             | HTB-19          | 0.1652                                            | 0.497                                            | +     | YES                | c.394A>C; Lys->Gln         | MUT         | -                 | -                                                  |
| BT-549     | Breast c.  | ATCC             | HTB-122         | 9.0576                                            | 1.71                                             | -     | YES                | c.747G>C; Arg->Ser         | MUT         | -                 | -                                                  |
| MDA-MB-468 | Breast c.  | ATCC             | HTB-132         | 7.1258                                            | 2.8                                              | -     | YES                | c.818G>A; Arg->His         | MUT         | -                 | -                                                  |
| MDA-MB-231 | Breast c.  | ATCC             | HTB-26          | 0.0095                                            | 0.036                                            | +     | YES                | c.839G>A; Arg->Lys         | MUT         | -                 | -                                                  |
| MCF7       | Breast c.  | ATCC             | HTB-22          | >9.524                                            | 3.27                                             | -     | YES                | WT                         | WT          | -                 | -                                                  |
| HCC1937    | Breast c.  | ATCC             | CRL-2336        | 0.07                                              | 0.082                                            | +     | YES                | c.916C>T; Arg->STOP        | MUT         | -                 | -                                                  |

\*NSCLC data from Sos, *et al.* (2009), breast cancer data from Huang, *et al.* (2007)

<sup>†</sup>whether the GI<sub>50</sub> values from the literature and this paper agree

<sup>‡</sup>according to the IARC TP53 database [Petitjean, *et al.* (2007)] version R15

<sup>§</sup>Max Planck Institute for Neurological Research (Cologne, Germany)

**Table S 2 . Mass spectrometric pairing scheme**

| <b>Exp. number</b> | <b>Group medium</b> | <b>Group heavy</b> | <b>Cell line light</b> | <b>Cell line medium</b> | <b>Cell line heavy</b> |
|--------------------|---------------------|--------------------|------------------------|-------------------------|------------------------|
| 1                  | +                   | -                  | CELLMIX                | LouNH91                 | H460                   |
| 2                  | +                   | -                  | CELLMIX                | H1648                   | Calu6                  |
| 3                  | +                   | -                  | CELLMIX                | HCC827                  | LCLC103H*              |
| 4                  | +                   | -                  | CELLMIX                | H322M                   | H2077                  |
| 5                  | +                   | -                  | CELLMIX                | H2030                   | H1395                  |
| 6                  | +                   | -                  | CELLMIX                | HCC2279                 | H2172                  |
| 7                  | +                   | -                  | CELLMIX                | H1568*                  | H647*                  |
| 8                  | +                   | -                  | CELLMIX                | H322*                   | HOP62*                 |
| 9                  | +                   | -                  | CELLMIX                | HCC366                  | HCC78                  |
| 10                 | +                   | -                  | CELLMIX                | HCC4006                 | HCC1359*               |
| 11                 | +                   | -                  | CELLMIX                | H1666                   | H157                   |
| 12                 | +                   | -                  | CELLMIX                | PC9                     | H520                   |
| 13                 | +                   | -                  | CELLMIX                | H2009                   | H2887*                 |
| 14 <sup>†</sup>    | -                   | +                  | CELLMIX                | H2077                   | H322M                  |
| 15 <sup>‡</sup>    | -                   | +                  | CELLMIX                | H2887*                  | H2009                  |
| 16                 | +                   | -                  | CELLMIX                | BT-20                   | MDA-MB-468             |
| 17                 | -                   | +                  | CELLMIX                | BT-549                  | MDA-MB231              |
| 18                 | +                   | -                  | CELLMIX                | HCC1937                 | MCF7                   |

\*this cell line's GI50 value turned out to be inconsistent with the one reported in Sos, *et al.* (2009); thus, the cell line was not used in the analysis

<sup>†</sup>label switch of experiment 4

<sup>‡</sup>label switch of experiment 13

**Table S 3 . Significantly enriched GO terms**

| <b>GO term</b>                                                  | <b>GO id</b> | <b>Category*</b> | <b>q-value<sup>†</sup></b> |
|-----------------------------------------------------------------|--------------|------------------|----------------------------|
| cell communication                                              | GO:0007154   | GOBP             | 2.5E-06                    |
| signal transduction                                             | GO:0007165   | GOBP             | 2.5E-06                    |
| signal transducer activity                                      | GO:0004871   | GOMF             | 5.1E-04                    |
| cytoskeletal protein binding                                    | GO:0008092   | GOMF             | 5.1E-04                    |
| small GTPase regulator activity                                 | GO:0005083   | GOMF             | 5.5E-04                    |
| regulation of cellular process                                  | GO:0050794   | GOBP             | 7.2E-04                    |
| GTPase regulator activity                                       | GO:0030695   | GOMF             | 1.1E-03                    |
| protein kinase activity                                         | GO:0004672   | GOMF             | 2.0E-03                    |
| protein serine/threonine kinase activity                        | GO:0004674   | GOMF             | 2.9E-03                    |
| protein tyrosine kinase activity                                | GO:0004713   | GOMF             | 2.9E-03                    |
| receptor activity                                               | GO:0004872   | GOMF             | 2.9E-03                    |
| phosphotransferase activity, alcohol group as acceptor          | GO:0016773   | GOMF             | 3.6E-03                    |
| lipid binding                                                   | GO:0008289   | GOMF             | 3.6E-03                    |
| kinase activity                                                 | GO:0016301   | GOMF             | 3.7E-03                    |
| actin binding                                                   | GO:0003779   | GOMF             | 3.7E-03                    |
| zinc ion binding                                                | GO:0008270   | GOMF             | 1.2E-02                    |
| Ras protein signal transduction                                 | GO:0007265   | GOBP             | 1.2E-02                    |
| protein amino acid phosphorylation                              | GO:0006468   | GOBP             | 1.2E-02                    |
| regulation of cell communication                                | GO:0010646   | GOBP             | 1.3E-02                    |
| transferase activity, transferring phosphorus-containing groups | GO:0016772   | GOMF             | 1.3E-02                    |
| regulation of signal transduction                               | GO:0009966   | GOBP             | 1.7E-02                    |
| GTPase activator activity                                       | GO:0005096   | GOMF             | 2.0E-02                    |
| cell surface receptor linked signal transduction                | GO:0007166   | GOBP             | 2.1E-02                    |
| intracellular signaling cascade                                 | GO:0007242   | GOBP             | 2.2E-02                    |
| enzyme activator activity                                       | GO:0008047   | GOMF             | 2.2E-02                    |
| vesicle-mediated transport                                      | GO:0016192   | GOBP             | 2.4E-02                    |
| Rho protein signal transduction                                 | GO:0007266   | GOBP             | 2.5E-02                    |
| transport                                                       | GO:0006810   | GOBP             | 2.5E-02                    |
| establishment of localization                                   | GO:0051234   | GOBP             | 2.5E-02                    |
| amine binding                                                   | GO:0043176   | GOMF             | 2.7E-02                    |
| epidermal cell differentiation                                  | GO:0009913   | GOBP             | 2.9E-02                    |
| phosphorylation                                                 | GO:0016310   | GOBP             | 2.9E-02                    |
| transmembrane receptor activity                                 | GO:0004888   | GOMF             | 3.1E-02                    |
| cytoskeleton organization                                       | GO:0007010   | GOBP             | 3.5E-02                    |
| locomotory behavior                                             | GO:0007626   | GOBP             | 3.5E-02                    |
| transition metal ion binding                                    | GO:0046914   | GOMF             | 3.8E-02                    |
| phosphate metabolic process                                     | GO:0006796   | GOBP             | 4.0E-02                    |
| Rho guanyl-nucleotide exchange factor activity                  | GO:0005089   | GOMF             | 4.3E-02                    |
| actin filament binding                                          | GO:0051015   | GOMF             | 4.6E-02                    |
| post-translational protein modification                         | GO:0043687   | GOBP             | 4.7E-02                    |

\*GOBP: biological process, GOMF: mecular function

<sup>†</sup>adjusted p-value

**Table S4 . Additional phosphorylation site information**

| Gene Name | Site* | Canonical Uniprot id <sup>†</sup> | Canonical site <sup>‡</sup> | All Uniprot ids <sup>§</sup>                                         | Known <sup>¶</sup> site |
|-----------|-------|-----------------------------------|-----------------------------|----------------------------------------------------------------------|-------------------------|
| ITGB4     | S1448 | P16144                            | S1518                       | A0AVL6;B7ZLD5;B7ZLD8;Q0VF97;Q59H46;P16144-2;P16144;P16144-4          | YES                     |
| BAIAP2    | S509  | Q9UQB8-5                          | S509                        | Q9UQB8-5;B3KPV9                                                      | no                      |
| ITGB4     | S1387 | P16144                            | S1457                       | A0AVL6;B7ZLD5;B7ZLD8;Q0VF97;Q59H46;P16144-2;P16144;P16144-3;P16144-4 | YES                     |
| ITGB4     | T1385 | P16144                            | T1455                       | A0AVL6;B7ZLD5;B7ZLD8;Q0VF97;Q59H46;P16144-2;P16144;P16144-3;P16144-4 | no                      |
| ITGB4     | S1069 | P16144                            | S1069                       | A0AVL6;B7ZLD5;B7ZLD8;Q0VF97;Q59H46;P16144-2;P16144;P16144-3;P16144-4 | YES                     |
| GPCR5A    | S345  | Q8NFJ5                            | S345                        | A8K556;Q8NFJ5                                                        | YES                     |
| ITPR3     | S916  | Q14573                            | S916                        | Q14573;Q59ES2;A6H8K3                                                 | YES                     |
| TNKS1BP1  | S429  | Q9C0C2                            | S429                        | Q9C0C2;B3KXS7                                                        | YES                     |
| ARHGEF18  | S1101 | Q6ZSZ5                            | S1101                       | Q6ZSZ5;B5ME81;D6W646;Q6ZSZ5-2;A8MV62;Q6ZSZ5-3                        | YES                     |
| IASPP     | S102  | Q8WUF5                            | S102                        | Q8WUF5;Q6ZLN8                                                        | YES                     |
| APG16L    | S269  | Q676U5                            | S269                        | Q676U5;Q676U5-3;Q676U5-4;Q17RG0;Q53SV2                               | YES                     |
| TPD52L2   | S141  | O43399                            | S161                        | O43399;Q6FGS1;Q53GA0;B4DDV4;O43399-2;Q68E05;B4DPJ6                   | YES                     |

\*as reported throughout the paper

<sup>†</sup>the main Uniprot entry of the corresponding protein

<sup>‡</sup>the position in the canonical Uniprot entry

<sup>§</sup>all Uniprot accession numbers from which the corresponding phosphopeptide could originate

<sup>¶</sup>according to PhosphoSitePlus ([www.phosphosite.org](http://www.phosphosite.org)) accessed on 6<sup>th</sup> August 2011

|| detected in mouse only

**Table S 5 . Log10 ratios of cell lines versus SuperSILAC mix**

| Cell line  | Indication | Class | ITGB4<br>S1448 | BAIAP2<br>S509 | ITGB4<br>S1387 | ITGB4<br>T1385 | ITGB4<br>S1069 | GPCR5A<br>S345 | ITPR3<br>S916 | TNKS1BP1<br>S429 | ARHGEF18<br>S1101 | IASPP<br>S102 | APG16L<br>S269 | TPD52L2<br>S141 |
|------------|------------|-------|----------------|----------------|----------------|----------------|----------------|----------------|---------------|------------------|-------------------|---------------|----------------|-----------------|
| LouNH91    | NSCLC      | +     | 0.265          | 0.239          |                |                |                | 0.192          | 0.560         | 0.840            | -0.042            | 0.312         |                |                 |
| H1648      | NSCLC      | +     |                | 0.735          | 0.643          | 0.507          | 0.412          | 0.644          | -0.103        | 0.693            | 0.074             | 0.402         | 0.345          | 0.393           |
| HCC827     | NSCLC      | +     |                |                |                |                |                |                | 0.033         | 0.032            | 0.558             |               | -0.194         | 0.734           |
| H322M      | NSCLC      | +     | 0.926          | 0.645          | 0.819          | 0.909          | 0.852          | 0.588          | -0.070        | -0.479           | 0.085             | 0.456         | -0.118         | 0.399           |
| H2030      | NSCLC      | +     | 0.463          |                | 0.377          |                | 0.383          | 0.567          | -0.305        | 0.070            | 0.439             | 0.421         | 0.089          | 0.746           |
| HCC2279    | NSCLC      | +     | 1.012          | 0.442          | 0.758          | 0.656          | 0.943          | 0.484          | 0.194         | 0.396            | 0.422             |               | 0.124          |                 |
| HCC366     | NSCLC      | +     | 0.896          |                | 0.746          | 0.655          | 0.818          | 0.562          |               | 0.011            | -0.008            |               |                | 0.259           |
| HCC4006    | NSCLC      | +     | 0.890          | 0.261          | 0.900          | 0.903          |                | 0.603          | -0.034        | 0.044            | 0.121             | 0.799         | -0.235         | 0.461           |
| H1666      | NSCLC      | +     | 0.717          | 0.865          | 0.913          | 0.690          | 0.865          | 0.032          |               | 0.130            | 0.386             | 0.529         | -0.008         | 0.810           |
| PC9        | NSCLC      | +     |                | 0.296          | 0.644          | 0.644          | 1.101          | 0.173          | 0.160         | -0.132           | 0.123             | 0.399         | -0.021         | 0.580           |
| H2009      | NSCLC      | +     | 0.962          | 0.685          | 0.996          | 0.820          | 1.466          | 0.172          | -0.456        | 0.138            | 0.047             | 0.605         | -0.082         | 0.279           |
| H460       | NSCLC      | -     | -0.142         | -0.866         |                |                |                | -0.073         | -1.025        | -0.736           | -0.484            | -0.429        |                |                 |
| Calu6      | NSCLC      | -     |                | -0.477         | -0.421         | -0.554         | -0.544         | -0.223         | -0.479        | -0.998           | -0.467            | -0.188        | -0.716         | -0.597          |
| H2077      | NSCLC      | -     | -0.597         | -0.757         | -0.609         | -0.410         | -0.892         | -0.349         | -0.579        | -0.692           | -0.411            | -0.139        | -1.069         | -0.367          |
| H1395      | NSCLC      | -     | -0.765         |                | -0.787         |                | -0.857         | -0.353         | -0.792        | -1.086           | -0.211            | 0.058         | -1.077         | -0.077          |
| H2172      | NSCLC      | -     | -0.705         | -0.549         | 0.042          | -0.174         |                | -0.350         | -0.839        | -0.998           | -0.263            |               | -0.381         |                 |
| HCC78      | NSCLC      | -     | -0.936         |                | -0.049         | -0.218         | 0.257          | -0.071         |               | -0.239           | -0.334            |               |                | 0.192           |
| H157       | NSCLC      | -     | -0.109         | -0.797         | -0.233         | -0.310         | -0.211         | -0.971         |               | -0.990           | -0.226            | -0.040        | -0.478         | 0.017           |
| H520       | NSCLC      | -     |                | -0.348         | -0.189         | -0.189         | 0.029          | -0.552         | -0.986        | -0.807           | -0.129            | 0.051         | -0.776         | -0.127          |
| BT-20      | Breast c.  | +     |                | 0.585          | 0.457          | 0.575          | 0.478          | 0.135          | 0.083         | 0.295            |                   | 0.668         | -0.008         | 0.911           |
| MDA-MB-231 | Breast c.  | +     | 0.580          |                | 0.403          | 0.432          | 0.738          | 0.243          | 0.547         | -0.114           |                   |               | -0.188         | -0.431          |
| HCC1937    | Breast c.  | +     | 0.495          | 0.555          | 0.723          | 0.685          | 0.834          | -0.487         | 0.648         | 0.807            | 0.092             | 0.098         | 0.569          | 1.252           |
| MDA-MB-468 | Breast c.  | -     |                | -0.163         | 0.160          | 0.290          | -0.055         | -0.181         | -0.147        | 0.747            |                   | 0.316         | 0.327          | 0.634           |
| BT-549     | Breast c.  | -     | -0.934         |                | -1.239         | -1.428         | -0.622         | -0.296         | -0.642        | 0.153            |                   |               | -0.009         | -0.494          |
| MCF7       | Breast c.  | -     | -0.471         | 0.305          | -0.181         | -0.114         | -0.795         | 0.127          | -0.059        | 0.231            | -0.531            | 0.177         | 0.049          | 0.586           |



**Table S 6 . Log10 ratios (cell line versus SuperSILAC) of the eight non-modified ribosomal peptides used for the alternative normalisation**

| Peptide Seq. Name | Uniprot Id | FNADEFEDMVAEK | FTPGTFTNQIAAFREPR | RPSA   | HGSLGFLPR | HMYHSLYLK | ILDSVGIEADDDRLNK | NIEDVIAQGIGK | TIAECLADELINAAK | RPS5   | VCTLAIDPGDSDIIR |
|-------------------|------------|---------------|-------------------|--------|-----------|-----------|------------------|--------------|-----------------|--------|-----------------|
|                   |            | P27635        | P08865            | P39023 | P39023    | P84098    | P05387           | P05387       | P46782          | P46782 | P62888          |
| LouNHI            |            | 0.247         | 0.243             | 0.273  | 0.080     |           | 0.157            | 0.255        |                 | 0.161  |                 |
| H1648             |            | 0.282         | 0.238             | 0.220  | 0.320     |           | 0.257            | 0.255        |                 | 0.287  |                 |
| HCC827            |            | 0.182         | 0.146             |        | 0.056     |           | 0.147            | 0.180        |                 | 0.130  |                 |
| H322M             |            |               |                   | 0.277  | 0.177     |           |                  |              |                 |        |                 |
| H2030             |            |               | 0.196             | 0.264  | 0.181     | 0.306     | 0.250            |              |                 |        |                 |
| HCC2279           |            | 0.270         | 0.063             | 0.219  | 0.307     | 0.154     | 0.232            | 0.132        |                 | 0.218  |                 |
| HCC366            |            | 0.238         | 0.158             | 0.140  | 0.295     | 0.148     | 0.221            | 0.220        |                 | 0.259  |                 |
| HCC4006           |            |               |                   |        | 0.301     |           | 0.161            |              |                 |        |                 |
| H1666             |            | 0.095         | 0.121             | 0.138  | 0.151     | 0.149     | 0.125            | 0.112        |                 | 0.147  |                 |
| PC9               |            | 0.208         | 0.143             | 0.228  | 0.218     | 0.257     | 0.272            | 0.276        |                 | 0.282  |                 |
| H2009             |            | 0.087         | 0.174             | 0.103  | 0.223     | 0.096     | 0.021            |              |                 |        |                 |
| H460              |            | 0.426         | 0.417             | 0.471  | 0.252     |           | 0.353            | 0.461        |                 | 0.361  |                 |
| Calu6             |            | 0.340         | 0.278             | 0.303  | 0.397     |           | 0.383            | 0.330        |                 | 0.339  |                 |
| H2077             |            |               |                   | 0.445  | 0.409     | 0.456     |                  |              |                 |        |                 |
| H1395             |            |               | 0.068             | 0.241  | 0.264     | 0.344     | 0.249            |              |                 |        |                 |
| H2172             |            | 0.214         | 0.198             | 0.173  | 0.302     | 0.182     | 0.238            | 0.194        |                 | 0.149  |                 |
| HCC7              |            | 0.203         | 0.167             | 0.243  | 0.240     | 0.280     | 0.228            | 0.211        |                 | 0.193  |                 |
| H157              |            | 0.200         | 0.189             | 0.145  | 0.210     | 0.211     | 0.100            | 0.129        |                 | 0.111  |                 |
| H520              |            | 0.149         | 0.198             | 0.205  | 0.221     | 0.250     | 0.217            | 0.225        |                 | 0.192  |                 |

## 5 Supplemental files

**Supplement 1:** This document. Contains supplementary information, Figures S1-S8 and Tables S1-S6.

**Supplement 2:** Data of the 25,020 class-I sites from the NSCLC experiments.

**Supplement 3:** Data of the 13,730 class-I sites from the breast cancer experiments.

**Supplement 4:** MS/MS spectra of the 25,020 class-I sites from the NSCLC experiments. The spectra are named xxx\_yyy.svg, where xxx is the id of the phosphosite in Supplement 2 and yyy is the scan number.

**Supplement 5:** MS/MS spectra of the 13,730 class-I sites from the breast cancer experiments. The spectra are named xxx\_yyy.svg, where xxx is the id of the phosphosite in Supplement 3 and yyy is the scan number.
